# Supplementary material for: B cells orchestrate tolerance to the neuromyelitis optica autoantigen AQP4
Source: PubMed Central journal article supplement (PMC10937377; doi:10.1038/s41586-024-07079-8), 2024-02-21
Supplement: 41586_2024_7079_MOESM4_ESM.pdf [file 41586_2024_7079_MOESM4_ESM.pdf]

## Supplementary Table 2

### Taqman probes

| Gene  | Assay ID      | Species | Company       | Catalog # |
|-------|---------------|---------|---------------|-----------|
| AQP4  | Mm00802129_m1 | Mouse   | Thermo Fisher | 4351372   |
| Aire  | Mm00477461_m1 | Mouse   | Thermo Fisher | 4331182   |
| GAPDH | Mm99999915_g1 | Mouse   | Thermo Fisher | 4331182   |
| MOG   | MM01279062_m1 | Mouse   | Thermo Fisher | 4331182   |
| AQP4  | Hs00242341_m1 | Human   | Thermo Fisher | 4331182   |
| GAPDH | Hs02786624_g1 | Human   | Thermo Fisher | 4351370   |

### Antibodies for flow cytometry

| Marker | Clone    | Species      | Fluorophore | Company         | Catalog# | Titration | RRID        |
|--------|----------|--------------|-------------|-----------------|----------|-----------|-------------|
| B220   | RA3-6B2  | Rat          | APC-R700    | BioLegend       | 103232   | 1:300     | AB_493716   |
| B220   | RA3-6B2  | Rat          | BV421       | BioLegend       | 103227   | 1:300     | AB_492877   |
| B220   | RA3-6B2  | Rat          | PE-Cy7      | BioLegend       | 103222   | 1:300     | AB_313004   |
| B220   | RA3-6B2  | Rat          | PerCP-Cy5.5 | BioLegend       | 103236   | 1:300     | AB_893356   |
| Bcl6   | K112-91  | Mouse        | BV421       | BD              | 563363   | 1:200     | AB_2738159  |
| CD2    | RPA-2    | Mouse        | BV421       | BD              | 562667   | 1:300     | AB_2737695  |
| CD3e   | 145-2C11 | Arm. Hamster | FITC        | eBioscience     | 11-0031  | 1:300     | AB_464882   |
| CD3e   | UCHT1    | Mouse        | PE          | Beckman Coulter | IM1282U  | 1:200     | AB_467059   |
| CD3e   | SK7      | Mouse        | PE-Cy7      | BD              | 341111   | 1:300     | AB_10596664 |

|               |        |              |             |             |             |       |             |
|---------------|--------|--------------|-------------|-------------|-------------|-------|-------------|
| CD4           | GK1.5  | Rat          | FITC        | BD          | 553729      | 1:500 | AB_395013   |
| CD4           | RM4-5  | Rat          | PerCP-eF710 | eBioscience | 46-0042     | 1:500 | AB_1834431  |
| CD5           | 53-7.3 | Rat          | AF647       | BioLegend   | 100614      | 1:300 | AB_493168   |
| CD8a          | 53-6.7 | Rat          | PE          | BD          | 553033      | 1:300 | AB_394571   |
| CD10          | 97C5   | Mouse        | APC         | Miltenyi    | 130-119-675 | 1:100 | AB_2660858  |
| CD11b         | M1/70  | Rat          | BV510       | BioLegend   | 101263      | 1:300 | AB_2561390  |
| CD11b         | M1/70  | Rat          | FITC        | BioLegend   | 101205      | 1:300 | AB_312788   |
| CD11c         | N418   | Arm. Hamster | PE-Cy7      | BioLegend   | 117318      | 1:300 | AB_493569   |
| CD14          | M5E2   | Mouse        | BV510       | BioLegend   | 301842      | 1:300 | AB_2561379  |
| CD16/<br>CD32 | 2.4G2  | Rat          | -           | BD          | 553142      | 1:100 | AB_394657   |
| CD19          | 1D3    | Rat          | APC         | BD          | 550992      | 1:300 | AB_398483   |
| CD19          | 1D3    | Rat          | PE          | BD          | 557399      | 1:300 | AB_395050   |
| CD19          | 6D5    | Rat          | BV510       | BioLegend   | 115546      | 1:300 | AB_2562136  |
| CD19          | 6D5    | Rat          | BV786       | BioLegend   | 115543      | 1:300 | AB_11218994 |
| CD19          | 6D5    | Rat          | PerCP       | BioLegend   | 115532      | 1:300 | AB_893278   |
| CD19          | HIB19  | Mouse        | BV421       | BioLegend   | 302234      | 1:200 | AB_11142678 |
| CD19          | SJ25C1 | Mouse        | APC         | BioLegend   | 363005      | 1:300 | AB_2564127  |
| CD21          | 7E9    | Rat          | PE-Cy7      | BioLegend   | 123420      | 1:300 | AB_1953276  |
| CD27          | M-T271 | Mouse        | BV510       | BioLegend   | 356420      | 1:200 | AB_2562603  |
| CD27          | O323   | Mouse        | PerCP-C5.5  | BioLegend   | 302819      | 1:30  | AB_11218994 |
| CD38          | HIT2   | Mouse        | BV711       | BD          | 563965      | 1:100 | AB_2738516  |
| CD45.1        | A20    | Mouse        | BV421       | BioLegend   | 110732      | 1:300 | AB_10896425 |
| CD45.2        | 104    | Mouse        | BV786       | BD          | 563686      | 1:300 | AB_2738375  |

|             |              |              |        |             |            |       |             |
|-------------|--------------|--------------|--------|-------------|------------|-------|-------------|
| CD95        | Jo2          | Arm. Hamster | BV421  | BD          | 562633     | 1:300 | AB_2737690  |
| CD95        | Jo2          | Arm. Hamster | PE     | BD          | 554258     | 1:300 | AB_464882   |
| EpCAM       | G8.8         | Rat          | BV421  | BioLegend   | 118225     | 1:300 | AB_2563983  |
| F4/80       | BM8          | Rat          | BV510  | BioLegend   | 123135     | 1:300 | AB_2562622  |
| F4/80       | BM8          | Rat          | FITC   | abcam       | ab60343    | 1:300 | AB_2637191  |
| Foxp3       | FJK-16s      | Rat          | AF488  | eBioscience | 53-5773    | 1:200 | AB_763537   |
| GL7         | GL7          | Rat          | PE-Cy7 | BD          | 561530     | 1:300 | AB_10715834 |
| IgD         | IA6-2        | Mouse        | AF488  | BioLegend   | 348216     | 1:200 | AB_11150595 |
| IgD         | 11-26c.2a    | Rat          | APC    | BioLegend   | 405714     | 1:300 | AB_10645480 |
| IgG (H+L)   | /            | Goat         | AF488  | Thermo      | A-11029    | 1:100 | AB_2534088  |
| IgM         | AF6-78       | Mouse        | FITC   | BD          | 553520     | 1:300 | AB_394901   |
| Ly6A/E      | D7           | Rat          | APC    | BioLegend   | 122512,    | 1:300 | AB_756196   |
| Ly6A/E      | D7           | Rat          | APC    | Thermo      | 12-5981-82 | 1:300 | AB_466086   |
| MHC-II      | M5/114.1 5.2 | Rat          | APC    | eBioscience | 17-5321    | 1:300 | AB_469454   |
| NK1.1       | PK136        | Mouse        | BV421  | eBioscience | 48-5941    | 1:300 | AB_2043877  |
| NK1.1       | PK136        | Mouse        | BV510  | BioLegend   | 108738     | 1:300 | AB_2562216  |
| NK1.1       | PK136        | Mouse        | FITC   | eBioscience | 11-5941    | 1:300 | AB_465319   |
| PD-1        | 29F.1A12     | Rat          | APC    | BioLegend   | 135210     | 1:300 | AB_2251944  |
| RORyt       | Q31-378      | Mouse        | BV786  | BD          | 564723     | 1:100 | AB_2738916  |
| T-bet       | 4B10         | Mouse        | PE-Cy7 | BioLegend   | 644824     | 1:200 | AB_2561760  |
| TCR $\beta$ | H57-597      | Arm. Hamster | FITC   | BD          | 553171     | 1:300 | AB_394683   |
| V $\beta$ 6 | RR4-7        | Rat          | BV786  | BD          | 744595     | 1:200 | AB_2742344  |

## Antibodies for immunohistochemistry

| Marker             | Clone      | Species | Company        | Catalog#   | Titration | Validation   |
|--------------------|------------|---------|----------------|------------|-----------|--------------|
| AQP4               | Polyclonal | Rat     | Sigma          | HPA014784  | 1:2000    | Manufacturer |
| B220               | RA3-6B2    | Rat     | BD             | 550286     | 1:300     | AB_394619    |
| Bcl6               | D65C10     | Rabbit  | Cell signaling | 5650       | 1:100     | Manufacturer |
| CD19               | D4V4B      | Rabbit  | Cell signaling | 90176      | 1:400     | Manufacturer |
| CD19               | 6OMP31     | Rat     | eBioscience    | 14-0194-80 | 1:200     | AB_2637171   |
| CD20               | L26        | Mouse   | Dako           | M0755      | 1:500     | Manufacturer |
| CD45               | 30-F11     | Rat     | Thermo         | 14-0451-82 | 1:500     | AB_467251    |
| EpCAM              | Polyclonal | Rabbit  | abcam          | ab71916    | 1:200     | Manufacturer |
| GFAP               | G-A-5      | Mouse   | Sigma          | G6171      | 1:400     | Manufacturer |
| IgG (H+L)<br>AF488 | Polyclonal | Donkey  | Thermo         | A21206     | 1:2000    | AB_2535792   |
| IgG (H+L)<br>AF568 | Polyclonal | Donkey  | Thermo         | A10037     | 1:2000    | AB_2534013   |
| IgG (H+L)<br>AF647 | Polyclonal | Goat    | abcam          | ab150087   | 1:500     | Manufacturer |
| IgG (H+L)<br>AF647 | Polyclonal | Donkey  | Life           | A31573     | 1:200     | AB_2536183   |
| IgG HRP            | Polyclonal | Goat    | Vector         | MP-7444    | 1:3000    | Manufacturer |
